# Supplementary material
Source: PubMed Central journal article supplement (PMC3674416)

Akt

WT

P-chk2  
6 months

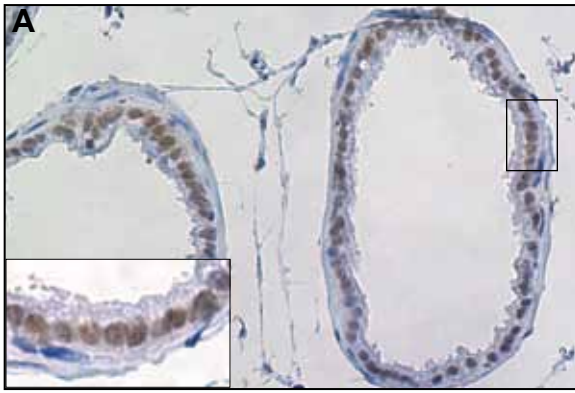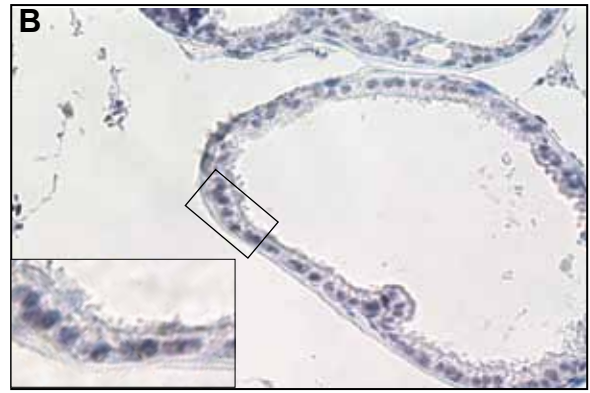

P-chk2  
9 months

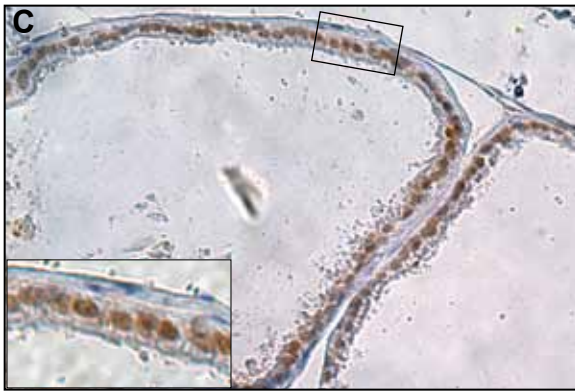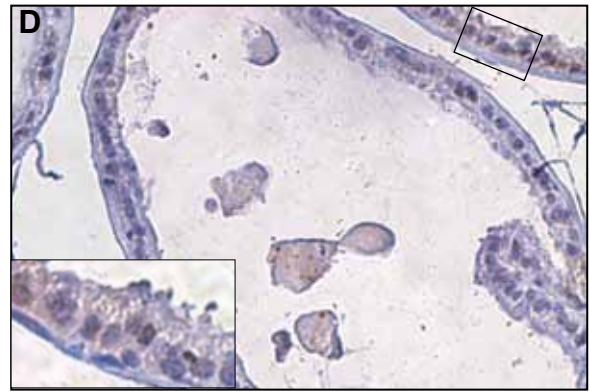

$\gamma$  H2AX  
6 months

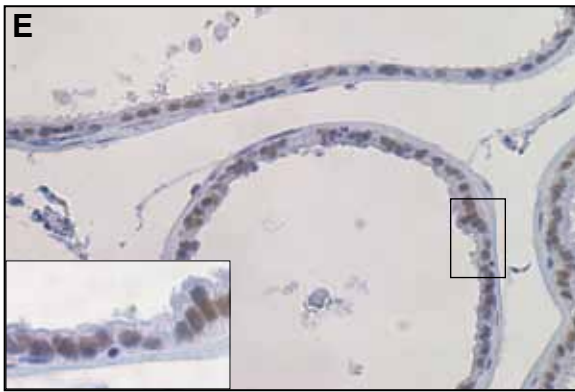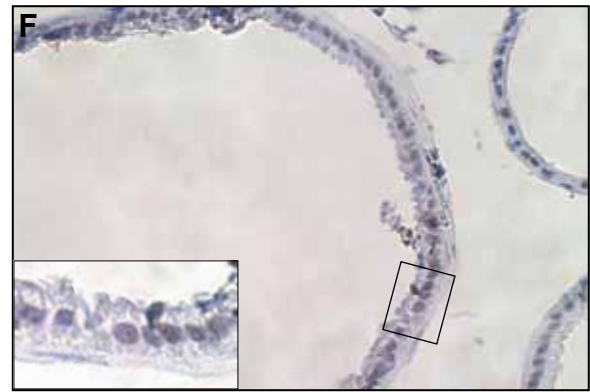

$\gamma$  H2AX  
9 months

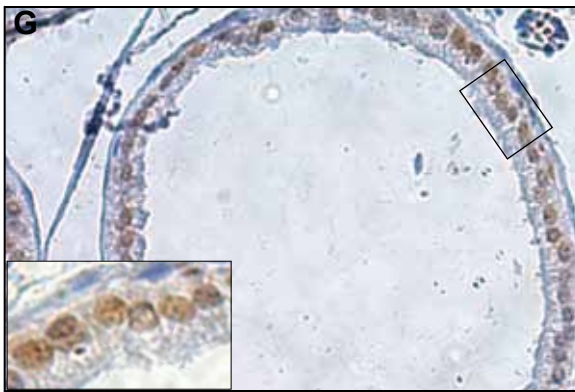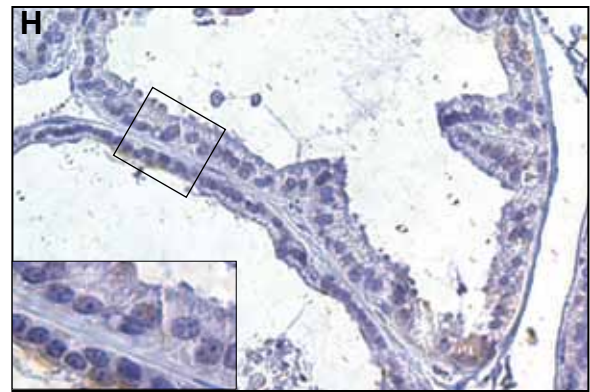

Supplement: NIHMS469831-supplement-Suppl_Fig__1.pdf [file NIHMS469831-supplement-Suppl_Fig__1.pdf]
